# Supplementary material
Source: HighWire-hosted journal article supplement (https://www.cmajopen.ca/highwire/filestream/88174/field_highwire_adjunct_files/4/open-2021-0321-original-submission.pdf)
Supplement: open-2021-0321-original-submission.pdf [file open-2021-0321-original-submission.pdf]

1  
2  
3 Title:4  
5 Detection of SARS CoV-2 contamination in the Operating Room and Birthing Room Setting: Risks to  
6 attending health care workers (a prospective cross-sectional study)  
7

## 8 Authors:

9  
10 Patricia E. Lee MD CM, LLM<sup>1</sup>, Robert Kozak PhD<sup>2</sup>, Nasrin Alavi MD<sup>3</sup>, Hamza Mbareche PhD<sup>3</sup>, Rose C. Kung  
11 MD, MSc<sup>1</sup>, Kellie E. Murphy MD, MSc<sup>4</sup>, Darian Perruzza MD<sup>3</sup>, Stephanie Jarvi BHSc<sup>3</sup>, Elsa Salvant HBSc<sup>3</sup>,  
12 Noor Niyar N. Ladhani MD, MPH<sup>5</sup>, Albert J.M. Yee MD, MSc<sup>6</sup>, Louise-Helene Gagnon MD CM, MScCH<sup>1</sup>,  
13 Richard Jenkinson MD, MSc<sup>6</sup>, Grace Y. Liu MD, MSc<sup>1</sup>  
1415 Corresponding Author: Patricia E. Lee, [pel.lee@utoronto.ca](mailto:pel.lee@utoronto.ca)  
1617  
18 <sup>1</sup> Divisions of Urogynecology and Minimally Invasive Gynecologic Surgery, Department of Obstetrics and  
19 Gynecology, Sunnybrook Health Sciences Centre, University of Toronto, Toronto, Ontario, Canada  
2021 <sup>2</sup> Division of Microbiology, Department of Medicine, Sunnybrook Health Sciences Centre, University of  
22 Toronto, Toronto, Ontario, Canada  
2324 <sup>3</sup> Sunnybrook Research Institute, Sunnybrook Health Sciences Centre, University of Toronto, Toronto,  
25 Ontario, Canada  
2627 <sup>4</sup> Division of Maternal Fetal Medicine, Department of Obstetrics and Gynecology, Sinai Health System,  
28 University of Toronto, Toronto, Ontario, Canada  
2930 <sup>5</sup> Division of Maternal Fetal Medicine, Department of Obstetrics and Gynecology, Sunnybrook Health  
31 Sciences Centre, University of Toronto, Toronto, Ontario, Canada  
3233 <sup>6</sup> Division of Orthopedics & Trauma Surgery, Department of Surgery, Sunnybrook Health Sciences Centre,  
34 University of Toronto, Toronto, Ontario, Canada  
35  
3637  
38 Funding Sources:39  
40 This study was supported by the Innovation Fund of the Alternative Funding Plan for the Academic  
41 Health Sciences Centres of Ontario (Lee) and a Chair's summer research student grant from the  
42 Department of Obstetrics & Gynecology, University of Toronto (Perruzza).  
4344  
45 The funders had no role in the design and conduct of the study; collection, management, analysis and  
46 interpretation of the data; preparation, review, or approval of the manuscript; and decision to submit  
47 the manuscript for publication.  
48

## 49 Declaration of authors:

50  
51 No disclosures or conflicts of interest are reported.  
52  
53  
54  
55  
56  
57  
58  
59  
60

1  
2  
3 ABSTRACT (249 words)  
4  
5

6 Background:

7  
8 The exposure risks to front-line health care workers (HCWs) who are in close proximity for prolonged  
9 periods of time, caring for COVID-19 patients undergoing surgery or obstetrical delivery, is unclear.  
10 Understanding of sample types that may harbour virus is important for evaluating risk.  
11

12 Aim

13 To determine if SARS-CoV-2 viral RNA from patients with COVID-19 undergoing surgery or obstetrical  
14 delivery is present in: 1) the peritoneal cavity of males and females 2) the female reproductive tract, 3)  
15 the environment of the surgery or delivery suite (surgical instruments, equipment used, air or floors)  
16 and 4) inside the masks of the attending health care workers.  
17

18 Methods

19  
20 In this cross-sectional study, conducted at 2 Toronto hospitals, 32 patients with COVID-19 underwent  
21 urgent surgery or obstetrical delivery and the presence of SARS-CoV-2 viral RNA in patient,  
22 environmental and air samples was identified by real time reverse transcriptase polymerase chain  
23 reaction. Air samples were collected using both active and passive sampling techniques. The primary  
24 outcome was the proportion of HCW masks positive for SARS-CoV-2 RNA.  
25

26 Results

27  
28 SARS-CoV-2 RNA was detected in 20/332 (6%) patient and environmental samples collected:  
29 4/24(16.7%) patient, 5/60(8.3%) floor, 1/54(1.9%) air, 10/23(43.5%) surgical instruments/equipment,  
30 0/24 cautery filters and 0/143(95%CI, 0-0.026) inner surface of mask samples.  
31

32 Interpretation

33 While there is evidence of SARS-CoV-2 RNA in the surgical and obstetrical operative environment, the  
34 finding of no detectable virus inside the masks worn by the medical teams would suggest a low risk of  
35 infection for our health care workers using appropriate personal protective equipment.  
36  
37  
38  
39  
40  
41  
42  
43  
44  
45  
46  
47  
48  
49  
50  
51  
52  
53  
54  
55  
56  
57  
58  
59  
60

1  
2  
3 TEXT (2387 words)  
4  
5  
6  
7

8  
9 INTRODUCTION (394 words)  
10

11 While front line health care workers (HCWs) are at risk of contracting infections when caring for patients  
12 with COVID-19<sup>1-3</sup>, the risks of HCWs involved in surgery and obstetrics (work involving close, direct and  
13 often prolonged patient contact) remains unclear. HCWs involved in surgery or obstetrics may be at risk  
14 of SARS-CoV-2 infections through the known vectors of respiratory droplets, aerosols and fomites<sup>4-6</sup>, but  
15 infections may potentially be transmitted through exposure to the virus originating from the surgical  
16 field or the delivery itself.  
17  
18

19 SARS-CoV-2 is found in the respiratory tract of infected persons<sup>7-10</sup>. Additionally, the virus has been  
20 documented to be present in the gastrointestinal (GI) tract and consequently any bowel-related surgery  
21 that involves opening the GI tract is thought to pose a risk to medical teams<sup>11,12</sup>. There are also reports  
22 of SARS-CoV-2 virus detected in peritoneal fluid from patients with COVID-19 undergoing surgery<sup>13,14</sup>. In  
23 the female reproductive tract, SARS-CoV-2 RNA has been identified in amniotic fluid and vaginal  
24 swabbing<sup>15-18</sup>. Potentially, if the virus is present on peritoneal surfaces of males or females, in the female  
25 reproductive tract or other surgical sites, this virus could be aerosolized via cautery smoke, or, from the  
26 release of CO<sub>2</sub> gas from laparoscopic procedures. While there is no current published research on the  
27 presence of SARS-CoV-2 in the surgical smoke/ plume, there is existing literature which identified other  
28 viruses including human papillomavirus, Human Immunodeficiency Virus-1 and Hepatitis B virus in  
29 surgical smoke<sup>19-28</sup>.  
30  
31  
32  
33  
34  
35  
36  
37  
38  
39  
40  
41  
42  
43  
44  
45  
46  
47  
48  
49

50  
51 The risks of aerosolization from the respiratory tract is recognized<sup>29</sup>, but the risk of SARS-CoV-2 residing  
52 in the surgical site and the subsequent risk of aerosolizing this virus is not well studied. We studied the  
53 risk of contamination in the operating room (OR) and birthing suite by evaluating the risk of  
54  
55  
56  
57  
58  
59  
60

1  
2  
3 aerosolization from the respiratory tract or from the surgical/obstetrical field during surgery or labor  
4  
5 and delivery. This information is key to assessing the risks to HCWs who care for such patients and may  
6  
7 help guide best practice regarding the use of personal protective equipment and safety in the OR and  
8  
9 birthing room.  
10

11  
12 The objectives are to determine if SARS-CoV-2 RNA from patients with COVID-19 undergoing surgery or  
13  
14 obstetrical delivery is present in: 1) the peritoneal cavity (males/females), 2) female reproductive tract,  
15  
16 3) on surgical instruments/equipment, 4) procedure room floors, 5) bioaerosols produced during surgery  
17  
18 or obstetrical delivery, and 6) inside surgical masks of the attending HCWs.  
19  
20  
21  
22  
23

## 24 METHODS

### 25 26 27 Study Design

28  
29  
30 From November 2020 to May 2021, patients with a nasopharyngeal (NP)/mid-turbinate (MT) swab  
31  
32 positive for SARS-CoV-2 by RT-PCR (reverse transcriptase polymerase chain reaction), in need of urgent  
33  
34 surgery or obstetrical delivery at one of two large academic Toronto hospitals: Sunnybrook Health  
35  
36 Sciences Centre (Sunnybrook) or Sinai Health System, were prospectively identified by the  
37  
38 surgical/obstetrical clinical teams. This study was approved by both hospitals' Research Ethics Boards.  
39  
40  
41

42 Patient samples (peritoneal fluid, vaginal, myometrial or placental swabs) were collected in patients  
43  
44 providing informed consent. Attending HCW mask sampling was performed with HCW consent. Patient  
45  
46 or HCW consent was not required for sampling from the air, floor, surgical instrument or cautery filters.  
47  
48 Consenting HCWs agreed to follow up with hospital Occupational Health if SARS-CoV-2 RNA was  
49  
50 detected on their mask.  
51  
52  
53

54 Patient clinical and laboratory data were obtained by chart review and/or participant interview.  
55  
56  
57  
58  
59  
60

1  
2  
3 Eligibility:  
4  
5

6 Patients included those who tested positive by NP swab, either symptomatic or asymptomatic within 30  
7 days of diagnosis; or known symptomatic COVID-19 positive patients beyond 30 days of diagnosis.  
8  
9

10  
11 HCWs included any consenting HCW present in the operating/delivery room, caring for the patient.  
12  
13

14 Study Samples (Appendix A included for detail):  
15  
16

17 Patient sampling for laparotomy cases included peritoneal cavity fluid (male or female). Patient samples  
18 for obstetrical cases included: vaginal fluid, swabs of the myometrium (at time of caesarean section) and  
19 membranous placenta.  
20  
21  
22

23  
24 Equipment and environmental samples included: swabs of the room floor (within 1 metre from the  
25 surgical site, and 2 metres away from the surgical site<sup>6</sup>; collection of the cautery filter; swab of  
26 equipment (e.g. endotracheal tube, saw blade, surgical instruments etc); and swab of the inside of the  
27 surgical mask worn by HCWs<sup>30-32</sup>.  
28  
29  
30  
31  
32

33  
34 Bioaerosol sampling was obtained via two previously described methods: 1) Active air sampling via the  
35 GilAir Plus sampler was used at two locations: as close to the surgical site as possible (within 0.5-1  
36 metres) and 2-3 metres away (Sensidyne®, [https://www.sensidyne.com/air-sampling-equipment/gilian-  
37 air-sampling-pumps/gilair-plus/](https://www.sensidyne.com/air-sampling-equipment/gilian-air-sampling-pumps/gilair-plus/))<sup>33</sup>, and 2) Passive air sampling was performed using an open Petri dish  
38 to collect any viral particles settling by gravity in the dish (within 1-2 metres of the patient, 1 metre off  
39 the floor)<sup>31,34-37</sup>. Passive air sampling was added for the last third of the cases due to newly published  
40 information<sup>31,34-36</sup>.  
41  
42  
43  
44  
45  
46  
47  
48  
49

50 Laboratory Methods:  
51  
52

53 All samples were processed at Sunnybrook. Aside from the cautery and active air sample filters, the  
54 laboratory staff were blinded to the source of the sample.  
55  
56  
57  
58  
59  
60

1  
2  
3 Virus detection was performed by real-time RT-PCR using a multi-target assay currently utilized in the  
4  
5 laboratory<sup>38</sup>.

6  
7  
8 Additionally, the Ct (cycle threshold) value of the assay as an estimate of the viral load was obtained for  
9  
10 all samples where possible, including values from the patient's initial diagnostic swab.

11  
12  
13 The outcome of interest was SARS-CoV-2 RNA PCR positive samples. Whole genome sequencing was not  
14  
15 performed with our surgical/obstetrical samples, but was performed on diagnostic nasopharyngeal  
16  
17 swabs when possible, to identify variants of concern (VOC).

18  
19  
20  
21 Sample Size and statistical analysis:

22  
23  
24 The primary outcome was the rate of SARS-CoV-2 RNA PCR positive samples from the HCWs masks. The  
25  
26 expected outcome was 0% positivity. We planned to study 40 patients with an expected mean of 2-3  
27  
28 HCW masks per patient (or 100 mask samples) which, with an expected positive rate of 0%, would  
29  
30 provide a 95% confidence interval range of 0-5% (R Statistical Software: R version 3.5.3, 2019). The study  
31  
32 was closed after sampling from 32 patients, with the collection of 143 masks providing adequate data to  
33  
34 study the primary outcome. Analysis was performed on all available data.

35  
36  
37  
38 Descriptive statistics, Shapiro-Wilk normality test, Mann-Whitney U test and 2-sample test for equality  
39  
40 of proportions with continuity correction tests were used where appropriate (R Statistical Software: R  
41  
42 version 3.5.3, 2019).

## 43 44 45 46 47 48 RESULTS

49  
50  
51 Patients:

1  
2  
3 A total of 32 patients with COVID-19 (Table I), 18 female and 14 male, were enrolled (mean 53.55 years,  
4  
5 SD = 18.068, range: 20-88 years): 9 obstetrical patients from Sunnybrook and Sinai Health System, and  
6  
7 23 urgent surgical patients from Sunnybrook. All patients and/or surgical team leads approached to  
8  
9 enter this study agreed and provided consent.  
10

11  
12 Of the 32 patients enrolled, the patient's first SARS-CoV-2 positive nasopharyngeal swab occurred a  
13  
14 median of 4 days before their procedure (mean 13.77, range: 0-70 days). 11/32 patients had a repeat NP  
15  
16 swab closer to the date of their procedure (median 3, mean 5.08, range: 0-24 days).  
17  
18

19  
20 Samples tested:  
21

22  
23 A total of 343 samples were taken for SARS-CoV-2 RNA detection: 11/343 were duplications (1 patient  
24  
25 submitted 2 masks; 10/12 endotracheal tubes (ETT) were sampled twice with different methodology:  
26  
27 flocked swab (4/12 samples positive for viral RNA) and dental pledget (7/10 samples positive). Twenty  
28  
29 of the 332 (6.02%) samples tested positive for SARS-CoV-2 RNA (Table II): 8/12 ETT, 1/6 peritoneal fluid  
30  
31 (1/5 caesarean section cases, 0/1 trauma laparotomy case), 1/7 placentas, 1/4 myometrial swabs, 1/7  
32  
33 vaginal fluid, 2/11 samples from surgical equipment of 11 different surgical cases, 1/7 passive air  
34  
35 samples, and 5/60 floor samples. There were no positive samples for SARS-CoV-2 RNA from among  
36  
37 cautery filters (0/24 cases); active air sampling (0/47, 25 cases) and the inside of HCWs masks (0/143,  
38  
39 95% CI 0-0.026, 32 cases sampled).  
40  
41  
42  
43

44 In 5 surgical cases, the initial positive diagnostic test was beyond 30 days: 1 caesarean section (30 days)  
45  
46 and 4 tracheostomies (50, 54, 62 and 70 days). Four of 5 of these cases (30, 54, 62, and 70 days) had  
47  
48 positive ETT samples, and 2 of the 4 ETT positive cases had positive floor samples (54 and 62 days since  
49  
50 diagnosis of COVID-19).  
51

52  
53 VOC were identified in 10 cases. Of the 10 VOC cases: 9 were the Alpha variant (United  
54  
55 Kingdom/B.1.1.7), and 1 was either Beta or Gamma variant (South African/B.1.351 or Brazilian/P.1). Of  
56  
57  
58  
59  
60

1  
2  
3 the 10 VOC cases, the following sites tested SARS-CoV-2 RNA positive: 3/4 endotracheal tubes (75%),  
4  
5 2/18 floor samples (including one sample 2 metres away), 1/5 passive air samples, 2/6 cases where the  
6  
7 surgical instruments were tested. There was no significant difference between the proportion of positive  
8  
9 samples when comparing the VOC group (n=10) versus unknown/not VOC group (n=22).

10  
11  
12 The cycle threshold (Ct) value of the initial nasopharyngeal swab positive for SARS-CoV-2 RNA was  
13  
14 recorded for 20/32 patients (median: 30.3, mean: 26.65, range: 11.86–37.25). For the VOC group, 9/10  
15  
16 had Ct values recorded (median: 24.41, mean: 24.52 [95% CI: 18.72-30.99], range: 11.86–37.25). For the  
17  
18 group that is unknown/not VOC, 11/22 had Ct values recorded (median: 31.10, mean: 28.41 [CI: 25.35-  
19  
20 30.33], range: 13.45–35.29). There was no significant difference in Ct values between these two groups  
21  
22 (Mann-Whitney U test,  $p=0.4561$ ). The Ct values of the initial NP swabs were significantly lower  
23  
24 (indicating higher viral loads) in those tested who were subsequently found to have any study sample  
25  
26 with SARS-CoV-2 RNA (13/32: Ct recorded in 8/13) versus those without any positive study samples  
27  
28 (19/32: Ct recorded in 12/19) with a mean Ct 21.72: 95% CI 16.90-27.29 vs mean 29.96: 95% CI 27.07-  
29  
30 33.43 respectively (Mann-Whitney U test,  $p=0.007$ ).  
31  
32  
33  
34  
35  
36  
37  
38  
39  
40

#### 41 INTERPRETATION

42 Several studies have documented potential risks of SARS-CoV-2 infection to HCWs in clinic and hospital  
43  
44 ward settings and with tracheostomies (an aerosol generating procedure)<sup>1,6,29,39</sup>. To our knowledge, this  
45  
46 is the first study evaluating potential exposure risks to HCWs in the operating room with a variety of  
47  
48 surgical procedures not known as aerosol generating. The OR is a unique environment as HCWs are in  
49  
50 prolonged and very close contact with patients. In our study, we detected SARS-CoV-2 RNA in non-  
51  
52 respiratory patient samples (peritoneal fluid, vaginal fluid, myometrium, placenta), surgical  
53  
54  
55  
56  
57  
58  
59  
60



1  
2  
3 equipment/instruments, and the surgical room environment. No contamination of the surgical masks  
4 worn by HCWs was detected.  
5  
6

7  
8 Our study corroborates earlier studies that have shown evidence of virus in respiratory tract and in  
9 surgical/obstetrical fields<sup>12,13,15-18,40-42</sup>. We have documented evidence of SARS-CoV-2 RNA in the GI tract,  
10 peritoneal cavity, and female genital tract, all of which could potentially be sources of aerosolized  
11 virus/viral particles. We did not find evidence of viral RNA in the orthopedic, cardiac and burn surgical  
12 equipment sampled. This may indicate that SARS-CoV-2 does not reside in this type of tissue or at least  
13 not present with a viral load high enough for detection.  
14  
15  
16  
17  
18  
19  
20

21  
22 With our study and others reporting the finding of virus in the peritoneal cavity, use of laparoscopy  
23 (which theoretically may be considered an aerosol generating procedure), could result in aerosolization  
24 of SARS-CoV-2<sup>11,13,14,43-47</sup>.  
25  
26  
27  
28

29  
30 We used standard techniques for air and floor sampling and found evidence of aerosolization of SARS-  
31 CoV-2<sup>6,31,33,34,36</sup>. While the frequency of positive tests was low, this does indicate that aerosolization of  
32 the virus does occur in surgery, but the source of the virus (respiratory or surgical/obstetrical fields) is  
33 unknown. It is possible that the true positive rates are higher since some contamination was likely  
34 below the detection limits of the tests<sup>6,31,33,34,36</sup>.  
35  
36  
37  
38  
39  
40

41  
42 We looked for characteristics of the patients' infections that would increase the risks of detection of  
43 viral RNA in the surgical/obstetrical fields or local environment. Higher viral load detected on the initial  
44 NP swab (as estimated by Ct threshold) was associated with higher risk of detectable virus in our  
45 samples, while the subtype of the SARS-CoV-2 virus was not.  
46  
47  
48  
49  
50

51  
52 We were unable to determine if the origin of aerosolized/droplet virus was arising from the surgical  
53 fields in the smoke plume. Others have not detected SARS-CoV-2 in electrocautery smoke despite using  
54 high viral loads in an *in vitro* setting<sup>28</sup>. While the lack of any positive viral RNA found on the smoke  
55  
56  
57  
58  
59  
60

1  
2  
3 evacuator filters tested would indicate that the viral contamination from the surgical field is absent or  
4  
5 below detection limits, these results cannot be used to definitely conclude that surgical smoke does not  
6  
7 harbour SARS-CoV-2.  
8  
9

10 Since infection with SARS-CoV-2 is primarily via the respiratory tract, we chose to sample the inside of  
11  
12 HCWs masks to identify viral contamination in close proximity to HCWs' respiratory tract. Face mask  
13  
14 sampling has been shown to be effective in detecting *Mycobacterium tuberculosis* contamination (and  
15  
16 other viruses)<sup>48-50</sup> and has been used to detect SARS-CoV-2 contamination of masks worn by HCWs  
17  
18 exposed to COVID-19 infected patients (0/25 positive, inside surface) and directly from patient masks  
19  
20 (6/10 positive)<sup>30</sup>. Others have studied SARS-CoV-2 viral contamination on the outer surface of face  
21  
22 shields worn by HCWs attending patients with COVID-19 in labour (one vaginal delivery with all face  
23  
24 shields tested being positive)<sup>34</sup>. We sampled the inside of masks and found 0/143 HCWs masks and 0/4  
25  
26 HCWs' face shields to be positive for SARS-CoV-2 RNA. Our study did not detect SARS-CoV-2 RNA on the  
27  
28 inner surface of any mask used by HCWs.  
29  
30  
31  
32

33 The study has some limitations. We do not have information on post-exposure COVID-19 infections  
34  
35 among HCWs, nor did we obtain information on HCW vaccination status or previous infections.  
36  
37

38 We recognize that due to issues of detection limits of the test and sampling issues, that it is possible that  
39  
40 not all viral contamination was detected with this study. Detection of SARS-CoV-2 RNA in bioaerosols is  
41  
42 recognized to be challenging, being highly dependent upon air flow, exchange rates and source of  
43  
44 emissions (reviewed by Borges et al) and it is suggested that parallel sampling with more than one  
45  
46 technique may increase sensitivity<sup>51</sup>. We did take measures such as using two different air sampling  
47  
48 techniques, increasing the size of floor samples taken for the testing and multiple testing to mitigate  
49  
50 these issues. Finally, even though viral RNA was detected, this study did not determine if infectious  
51  
52 virus was present.  
53  
54  
55  
56  
57  
58  
59  
60

1  
2  
3 In the future, there are three important studies to complete: the initial is to determine if the detected  
4 environmental viral RNA is infectious; secondly to determine the rates of clinical and sub-clinical  
5 infections of HCWs when exposed to patients with COVID-19 undergoing surgery or labour/delivery; and  
6 finally, our findings need to be validated externally.  
7  
8  
9  
10  
11  
12  
13  
14

## 15 CONCLUSION

16  
17  
18 There is evidence of SARS-CoV-2 RNA in the surgical and obstetrical patient's operative environment  
19 (surgical surfaces and aerosolized). However, the finding of no detectable virus on the inner surface of  
20 masks worn by the health care teams in our study reassuringly suggests a low risk of infection when  
21 wearing appropriate personal protective equipment.  
22  
23  
24  
25  
26  
27  
28  
29  
30  
31  
32  
33  
34  
35  
36  
37  
38  
39  
40  
41  
42  
43  
44  
45  
46  
47  
48  
49  
50  
51  
52  
53  
54  
55  
56  
57  
58  
59  
60

## ACKNOWLEDGEMENTS

We are grateful to our operating room nurses and our obstetrical nurses who participated in this study as well as the patients, their anesthetists and their surgeons.

## REFERENCES

1. Wang D, Hu B, Hu C, et al. Clinical Characteristics of 138 Hospitalized Patients With 2019 Novel Coronavirus-Infected Pneumonia in Wuhan, China. *JAMA*. 2020.
2. Baker MG, Peckham TK, Seixas NS. Estimating the burden of United States workers exposed to infection or disease: A key factor in containing risk of COVID-19 infection. *PLoS One*. 2020;15(4):e0232452.
3. Shah ASV, Wood R, Gribben C, et al. Risk of hospital admission with coronavirus disease 2019 in healthcare workers and their households: nationwide linkage cohort study. *BMJ*. 2020;371:m3582.
4. ASRM COVID task force: Segars JK, Q.;McQueen, D. B.;Kotlyar, A.;Glenn, T.;Knight, Z.;Feinberg, E. C.;Taylor, H. S.;Toner, J. S.;Kawwass, J. F. Prior and Novel Coronaviruses, COVID-19, and Human Reproduction: What Is Known? *Fertility and Sterility*. 2020.
5. van Doremalen NM, D. H.;Holbrook, M. G.;Gamble, A.;Williamson, B.;Tamin, A.;Harcourt, J. L.;Thornburg, N. J.;Gerber, S. I.;Lloyd-Smith, J. O.;de Wit, E.;Munster, V. J.;. Aerosol and Surface Stability of SARS-CoV-2 as Compared with SARS-CoV-1. *N Engl J Med* 2020;382:1564-1567.
6. Santarpia JL, Rivera DN, Herrera VL, et al. Aerosol and surface contamination of SARS-CoV-2 observed in quarantine and isolation care. *Sci Rep*. 2020;10(1):12732.
7. CDC. Coronavirus Disease (COVID-19). 2021; <https://www.cdc.gov/dotw/covid-19/index.html>. Accessed September 10, 2021.
8. Wiersinga WJ, Rhodes A, Cheng AC, Peacock SJ, Prescott HC. Pathophysiology, Transmission, Diagnosis, and Treatment of Coronavirus Disease 2019 (COVID-19): A Review. *JAMA*. 2020;324(8):782-793.
9. Karia R, Gupta I, Khandait H, Yadav A, Yadav A. COVID-19 and its Modes of Transmission. *SN Compr Clin Med*. 2020:1-4.
10. Kutti-Sridharan G, Vegunta R, Vegunta R, Mohan BP, Rokkam VRP. SARS-CoV2 in Different Body Fluids, Risks of Transmission, and Preventing COVID-19: A Comprehensive Evidence-Based Review. *Int J Prev Med*. 2020;11:97.
11. Surgeons SoAGaE. Update to SAGES recommendations regarding surgical response to COVID-19 crisis. 2020 March 21; <https://www.sages.org/recommendations-surgical-response-covid-19/>. Accessed September 10, 2021.
12. Gu J, Han B, Wang J. COVID-19: Gastrointestinal Manifestations and Potential Fecal-Oral Transmission. *Gastroenterology*. 2020;158(6):1518-1519.
13. Coccolini F, Tartaglia D, Puglisi A, et al. SARS-CoV-2 Is Present in Peritoneal Fluid in COVID-19 Patients. *Ann Surg*. 2020;272(3):e240-e242.

14. Barberis A, Rutigliani M, Belli F, Ciferri E, Mori M, Filauro M. SARS-Cov-2 in peritoneal fluid: an important finding in the Covid-19 pandemic. *Br J Surg*. 2020.
15. Schwartz A, Yogev Y, Zilberman A, et al. Detection of severe acute respiratory syndrome coronavirus 2 (SARS-CoV-2) in vaginal swabs of women with acute SARS-CoV-2 infection: a prospective study. *BJOG*. 2021;128(1):97-100.
16. Barber E, Kovo M, Leytes S, et al. Evaluation of SARS-CoV-2 in the Vaginal Secretions of Women with COVID-19: A Prospective Study. *J Clin Med*. 2021;10(12).
17. Vivanti AJ, Vauloup-Fellous C, Prevot S, et al. Transplacental transmission of SARS-CoV-2 infection. *Nat Commun*. 2020;11(1):3572.
18. Deniz M, Tezer H. Vertical transmission of SARS CoV-2: a systematic review. *The Journal of Maternal-Fetal & Neonatal Medicine*. 2020:1-8.
19. Sawchuk WS, Weber PJ, Lowy DR, Dzubow LM. Infectious papillomavirus in the vapor of warts treated with carbon dioxide laser or electrocoagulation: detection and protection. *J Am Acad Dermatol*. 1989;21(1):41-49.
20. Gloster HM, Jr., Roenigk RK. Risk of acquiring human papillomavirus from the plume produced by the carbon dioxide laser in the treatment of warts. *J Am Acad Dermatol*. 1995;32(3):436-441.
21. Johnson GK, Robinson WS. Human immunodeficiency virus-1 (HIV-1) in the vapors of surgical power instruments. *J Med Virol*. 1991;33(1):47-50.
22. Baggish MS, Poiesz BJ, Joret D, Williamson P, Refai A. Presence of human immunodeficiency virus DNA in laser smoke. *Lasers Surg Med*. 1991;11(3):197-203.
23. Kwak HD, Kim SH, Seo YS, Song KJ. Detecting hepatitis B virus in surgical smoke emitted during laparoscopic surgery. *Occup Environ Med*. 2016;73(12):857-863.
24. Hallmo P, Naess O. Laryngeal papillomatosis with human papillomavirus DNA contracted by a laser surgeon. *Eur Arch Otorhinolaryngol*. 1991;248(7):425-427.
25. Calero LB, T. Laryngeal papillomatosis— first recognition in Germany as an occupational disease in an operating room nurse. *Laryngorhinootologie*. 2003;82(11):790-793.
26. Rioux M, Garland A, Webster D, Reardon E. HPV positive tonsillar cancer in two laser surgeons: case reports. *J Otolaryngol Head Neck Surg*. 2013;42:54.
27. Zakka K, Erridge S, Chidambaram S, et al. Electrocautery, Diathermy, and Surgical Energy Devices: Are Surgical Teams at Risk During the COVID-19 Pandemic? *Ann Surg*. 2020;272(3):e257-e262.
28. Sowerby LJ, Nichols AC, Gibson R, et al. Assessing the Risk of SARS-CoV-2 Transmission via Surgical Electrocautery Plume. *JAMA Surg*. 2021.
29. Staibano P, Levin M, McHugh T, Gupta M, Sommer DD. Association of Tracheostomy With Outcomes in Patients With COVID-19 and SARS-CoV-2 Transmission Among Health Care Professionals: A Systematic Review and Meta-analysis. *JAMA Otolaryngol Head Neck Surg*. 2021.
30. Dargahi A, Jeddi F, Ghobadi H, et al. Evaluation of masks' internal and external surfaces used by health care workers and patients in coronavirus-2 (SARS-CoV-2) wards. *Environ Res*. 2021;196:110948.
31. Kim MC, Bae S, Kim JY, et al. Effectiveness of surgical, KF94, and N95 respirator masks in blocking SARS-CoV-2: a controlled comparison in 7 patients. *Infect Dis (Lond)*. 2020;52(12):908-912.
32. Phan LT, Sweeney D, Maita D, et al. Respiratory viruses on personal protective equipment and bodies of healthcare workers. *Infect Control Hosp Epidemiol*. 2019;40(12):1356-1360.
33. Kotwa JDJ, A.J.; Mbareche H.; Yip, L.; Aftanas, P; Barati, S.; Bell, N.G.; Bryce, E.; Coomes, E.; Crawl, G.; Duchaine, C.; Faheem, A.; Farooqi, L.; Hiebert, R.; Katz, K.; Khan, S.; Kozak, R.; Li, A.X.; Mistry, H.P.; Mozafarihashjin, M.; Nasir, J.A.; Nirmalarajah, K.; Panousis, E.M.; Paterson, A.; Plenderleith, S.; Powis, J.; Prost, K.; Schryer, R; Taylor, M.; Veillette, M.; Wong, T.; Zhong, X.Z.;

- 1  
2  
3  
4  
5  
6  
7  
8  
9  
10  
11  
12  
13  
14  
15  
16  
17  
18  
19  
20  
21  
22  
23  
24  
25  
26  
27  
28  
29  
30  
31  
32  
33  
34  
35  
36  
37  
38  
39  
40  
41  
42  
43  
44  
45  
46  
47  
48  
49  
50  
51  
52  
53  
54  
55  
56  
57  
58  
59  
60
- McArthur, A.G.; McGeer, A.J.; Mubareka, S. Surface and air contamination with SARS-CoV-2 from hospitalized COVID-19 patients in Toronto, Canada. *medRxiv*. 2021.
34. Hermes AC, Horve PF, Edelman A, et al. Severe Acute Respiratory Syndrome Coronavirus 2 (SARS-CoV-2) Environmental Contamination and Childbirth. *Obstet Gynecol*. 2020;136(4):827-829.
35. Baboli Z, Neisi N, Babaei AA, et al. On the airborne transmission of SARS-CoV-2 and relationship with indoor conditions at a hospital. *Atmos Environ (1994)*. 2021;261:118563.
36. Nissen K, Krambrich J, Akaberi D, et al. Long-distance airborne dispersal of SARS-CoV-2 in COVID-19 wards. *Sci Rep*. 2020;10(1):19589.
37. Napoli C, Marcotrigiano V, Montagna MT. Air sampling procedures to evaluate microbial contamination: a comparison between active and passive methods in operating theatres. *BMC Public Health*. 2012;12:594.
38. Vermeiren C, Marchand-Senechal X, Sheldrake E, et al. Comparison of Copan Eswab and FLOQswab for COVID-19 PCR diagnosis: working around a supply shortage. *J Clin Microbiol*. 2020.
39. Guo ZD, Wang ZY, Zhang SF, et al. Aerosol and Surface Distribution of Severe Acute Respiratory Syndrome Coronavirus 2 in Hospital Wards, Wuhan, China, 2020. *Emerg Infect Dis*. 2020;26(7).
40. Wang W, Xu Y, Gao R, et al. Detection of SARS-CoV-2 in Different Types of Clinical Specimens. *JAMA*. 2020.
41. Zou L, Ruan F, Huang M, et al. SARS-CoV-2 Viral Load in Upper Respiratory Specimens of Infected Patients. *N Engl J Med*. 2020;382(12):1177-1179.
42. Roberts DJ EA, Romero RJ, Coyne CB, Ting DT, Hornick JL, Zaki SR, Adhikari UD, Serghides L, Gaw SL, Metz TD, on behalf of all members of the NIH/NICHD SARSCoV-2 Placental Infection Workshop. SPECIAL REPORT: A standardized definition of placental infection by severe acute respiratory syndrome coronavirus 2 (SARS-CoV-2), a consensus statement from the National Institutes of Health/Eunice Kennedy Shriver National Institute of Child Health and Human Development (NIH/NICHD) SARS-CoV-2 placental infection workshop. *American Journal of Obstetrics and Gynecology*. 2021.
43. Pavan N, Crestani A, Abrate A, et al. Risk of Virus Contamination Through Surgical Smoke During Minimally Invasive Surgery: A Systematic Review of the Literature on a Neglected Issue Revived in the COVID-19 Pandemic Era. *Eur Urol Focus*. 2020;6(5):1058-1069.
44. Laparoscopists AAG. Statement regarding Laparoscopic Surgery During the COVID-19 Pandemic 2020 <https://www.aagl.org/news/covid-19-joint-statement-on-minimally-invasive-gynecologic-surgery/> Accessed September 10, 2021.
45. Mottrie A. ERUS (EAU Robotic Urology Section) guidelines during COVID-19 emergency. 2020.
46. Surgeons ACo. COVID-19: Considerations for Optimum Surgeon Protection Before, During, and After Operation. 2020; <https://www.facs.org/covid-19/clinical-guidance/surgeon-protection>; <https://www.facs.org/covid-19/faqs>. Accessed September 10, 2021.
47. Surgeons CAoG. Statement from the CAGS MIS Committee re: Laparoscopy and the risk of aerosolization. 2020; <https://cags-accg.ca/wp-content/uploads/2020/03/Laparoscopy-and-the-risk-of-aerosolization.pdf>. Accessed September 10, 2021.
48. Williams CM, Abdulwhhab M, Birring SS, et al. Exhaled Mycobacterium tuberculosis output and detection of subclinical disease by face-mask sampling: prospective observational studies. *Lancet Infect Dis*. 2020;20(5):607-617.
49. Chughtai AA, Stelzer-Braid S, Rawlinson W, et al. Contamination by respiratory viruses on outer surface of medical masks used by hospital healthcare workers. *BMC Infect Dis*. 2019;19(1):491.

- 1
- 2
- 3 50. Jones P, Roberts S, Hotu C, Kamona S. What proportion of healthcare worker masks carry virus?  
4 A systematic review. *Emerg Med Australas*. 2020;32(5):823-829.
- 5 51. Borges JT, Nakada LYK, Maniero MG, Guimaraes JR. SARS-CoV-2: a systematic review of indoor  
6 air sampling for virus detection. *Environ Sci Pollut Res Int*. 2021.
- 7
- 8
- 9
- 10
- 11
- 12
- 13
- 14
- 15
- 16
- 17
- 18
- 19
- 20
- 21
- 22
- 23
- 24
- 25
- 26
- 27
- 28
- 29
- 30
- 31
- 32
- 33
- 34
- 35
- 36
- 37
- 38
- 39
- 40
- 41
- 42
- 43
- 44
- 45
- 46
- 47
- 48
- 49
- 50
- 51
- 52
- 53
- 54
- 55
- 56
- 57
- 58
- 59
- 60

Confidential

**Table 1: Patient and case characteristics with results of samples taken**

| ID # | Age range* (yrs) | Sex | No. days from 1 <sup>st</sup> COVID-19 positive test to surgery (repeat test) | Surgical Division | Procedure performed                           | VOC        | NP swab (Ct value)<br><small>a, b</small> | Positive <sup>c</sup> samples obtained (Ct value)                         | Active air sampling time (min) | Negative <sup>d</sup> samples                   | Number of HCW masks <sup>e</sup> |
|------|------------------|-----|-------------------------------------------------------------------------------|-------------------|-----------------------------------------------|------------|-------------------------------------------|---------------------------------------------------------------------------|--------------------------------|-------------------------------------------------|----------------------------------|
| 1    | 30-39            | F   | 3                                                                             | OB                | Caesarean section (spinal anesthesia)         | Not tested | - (n/a)                                   | - (none)                                                                  | 74                             | •peritoneal fluid, placenta, myometrium, •floor | 3                                |
| 2    | 30-39            | F   | 4                                                                             | OB                | Caesarean section (spinal anesthesia)         | Not tested | -                                         | -                                                                         | 137                            | •peritoneal fluid, placenta, myometrium, •floor | 3                                |
| 3    | 40-49            | F   | 3                                                                             | OB                | Caesarean section (spinal anesthesia)         | Not tested | 30.89                                     | •placenta (25.9)                                                          | 89                             | •vaginal fluid<br>•patient mask<br>•floor       | 5                                |
| 4    | 20-29            | F   | 30 (24)                                                                       | OB                | Caesarean section (intubation and extubation) | Alpha      | 18.69                                     | •ETT (25.66)                                                              | 125                            | •peritoneal fluid, placenta, myometrium, •floor | 6                                |
| 5    | 20-29            | F   | 14 (0)                                                                        | OB                | Caesarean section (spinal anesthesia)         | Not VOC    | 34.29                                     | -                                                                         | Not sampled                    | •peritoneal fluid, placenta                     | 4                                |
| 6    | 30-39            | F   | 3                                                                             | OB                | Caesarean section                             | Alpha      | 24.41                                     | •Vaginal fluid (23.45)<br>•Peritoneal fluid (25.1)<br>•myometrium (28.34) | Not sampled                    | •floor                                          | 3                                |
| 7    | 30-39            | F   | 1                                                                             | OB                | Vaginal delivery                              | Not tested | 31.31                                     | -                                                                         | Not sampled                    | • vaginal fluid<br>•patient mask<br>•floor      | 3                                |
| 8    | 30-39            | F   | 0                                                                             | OB                | Vaginal delivery                              | Not tested | 18.87                                     | -                                                                         | Not sampled                    | •vaginal fluid, placenta, •floor                | 1                                |



|    |       |   |        |               |                                                                           |            |       |                                                                                                                                                |             |                                                                                                                                       |   |
|----|-------|---|--------|---------------|---------------------------------------------------------------------------|------------|-------|------------------------------------------------------------------------------------------------------------------------------------------------|-------------|---------------------------------------------------------------------------------------------------------------------------------------|---|
| 9  | 30-39 | F | 14 (0) | OB            | Vaginal (vacuum) Delivery                                                 | Alpha      | 14.81 | -                                                                                                                                              | Not sampled | <ul style="list-style-type: none"> <li>•vaginal fluid</li> <li>•placenta</li> <li>•integrated visor of mask (obstetrician)</li> </ul> | 6 |
| 10 | 50-59 | F | 1      | Gyne Oncology | TAH BSO, node dissection (intubation and extubation)                      | Not tested | 32.17 | -                                                                                                                                              | 146         | <ul style="list-style-type: none"> <li>•ETT</li> <li>•floor</li> </ul>                                                                | 5 |
| 11 | 40-49 | F | 16     | Gyne Oncology | TAHBSO omentectomy (intubation and extubation)                            | Alpha      | 11.86 | <ul style="list-style-type: none"> <li>•ETT (25.37)</li> <li>•surgical clamps, scissors (27.13)</li> <li>•floor at 2-metres (28.94)</li> </ul> | 149         | •floor near the OR table                                                                                                              | 6 |
| 12 | 80-89 | F | 4      | Ortho         | L hip hemiarthroplasty (spinal anesthesia)                                | Not tested | 21.44 | -                                                                                                                                              | Not sampled | <ul style="list-style-type: none"> <li>•saw blade</li> <li>•floor</li> </ul>                                                          | 1 |
| 13 | 30-39 | F | 2      | Ortho         | Bilat tibial fracture (spinal anesthesia)                                 | Not tested | -     | -                                                                                                                                              | 176         | <ul style="list-style-type: none"> <li>•drill bit</li> <li>•floor</li> </ul>                                                          | 5 |
| 14 | 50-59 | M | 22 (3) | Ortho         | T10-T12 spinal decompression (arrived in OR intubated and left intubated) | Not tested | 29.17 | •ETT (22.27)                                                                                                                                   | 242         | •floor                                                                                                                                | 6 |
| 15 | 70-79 | M | 2 (0)  | Ortho         | ORIF cervical spine fracture (arrived in OR intubated and left intubated) | Not tested | -     | -                                                                                                                                              | 211         | <ul style="list-style-type: none"> <li>•Petri dish UTM (passive air sampling)</li> <li>•floor</li> </ul>                              | 5 |
| 16 | 60-69 | F | 4(2)   | Ortho         | ORIF ankle, fibula                                                        | Alpha      | 32.35 | -                                                                                                                                              | 106         | <ul style="list-style-type: none"> <li>•scalpel blade and clamps</li> <li>•Petri dish UTM</li> <li>•floor</li> </ul>                  | 5 |
| 17 | 50-59 | M | 2      | Ortho         | Humerus fracture (came to OR intubated and left OR intubated)             | Not VOC    | 13.45 | •floor (21.97)                                                                                                                                 | 97          | <ul style="list-style-type: none"> <li>•scissors and clamps</li> <li>•Petri dish UTM</li> </ul>                                       | 5 |

|    |       |   |         |                 |                                                                                                                    |             |       |                                                          |     |                                                                                                                             |   |
|----|-------|---|---------|-----------------|--------------------------------------------------------------------------------------------------------------------|-------------|-------|----------------------------------------------------------|-----|-----------------------------------------------------------------------------------------------------------------------------|---|
| 18 | 70-79 | M | 26 (5)  | Ortho           | Superficial and deep compartment irrigation of leg and debridement (arrived in OR intubated and left OR intubated) | Alpha       | 37.25 | -                                                        | 68  | <ul style="list-style-type: none"> <li>scalpel blade, scissors and clamps</li> <li>Petri dish UTM</li> <li>floor</li> </ul> | 4 |
| 19 | 50-59 | M | 1       | General Surgery | Laparotomy (came to OR intubated and left intubated)                                                               | Not tested  | 32.7  | -                                                        | 189 | <ul style="list-style-type: none"> <li>Peritoneal fluid,</li> <li>floor</li> <li>face shield (surgeon)</li> </ul>           | 4 |
| 20 | 50-59 | F | 15      | General Surgery | Bilat mastectomy (intubation and extubation)                                                                       | Not tested  | -     | -                                                        | 123 | <ul style="list-style-type: none"> <li>ETT</li> <li>floor</li> </ul>                                                        | 5 |
| 21 | 70-79 | M | 70 (3)  | General Surgery | Tracheostomy                                                                                                       | Not tested  | -     | •ETT (21.74)                                             | 111 | <ul style="list-style-type: none"> <li>floor</li> </ul>                                                                     | 5 |
| 22 | 60-69 | M | 50 (5)  | General Surgery | Tracheostomy                                                                                                       | Alpha       | -     | -                                                        | 69  | <ul style="list-style-type: none"> <li>ETT</li> <li>floor</li> </ul>                                                        | 5 |
| 23 | 60-69 | M | 54 (16) | General Surgery | Tracheostomy                                                                                                       | Not VOC     | -     | •ETT (22.53)<br>•floor (28.19)                           | 68  | <ul style="list-style-type: none"> <li>floor at 2 metres</li> </ul>                                                         | 4 |
| 24 | 70-79 | F | 62 (2)  | General Surgery | Tracheostomy, gastroscopy, insertion of gastrostomy tube                                                           | Not VOC     | 32.94 | •ETT (20.7)<br>•floor (20.9)                             | 117 | <ul style="list-style-type: none"> <li>clamps and scissors</li> <li>Petri dish UTM</li> </ul>                               | 5 |
| 25 | 70-79 | M | 4       | GI              | Gastro duodenoscopy                                                                                                | Alpha       | 18.62 | •Gastroscope (30.56)                                     | 62  | <ul style="list-style-type: none"> <li>Petri dish UTM</li> <li>floor</li> </ul>                                             | 3 |
| 26 | 60-69 | F | 2       | Burn            | Burn reconstruction (intubation and extubation)                                                                    | Not tested  | -     | •ETT (24.88)                                             | 142 | <ul style="list-style-type: none"> <li>floor</li> <li>face shield (surgeon)</li> </ul>                                      | 7 |
| 27 | 70-79 | M | 2       | Burn            | Debridement, graft lower abdomen, thighs (intubation and extubation)                                               | Beta/ Gamma | 26.69 | •ETT (24.32)<br>•floor (24.97)<br>•Petri dish UTM (28.4) | 173 | <ul style="list-style-type: none"> <li>scalpel blade, scissors and clamps</li> </ul>                                        | 4 |
| 28 | 20-29 | M | 2       | Plastics        | Hand surgery (regional block)                                                                                      | Not tested  | 35.29 | -                                                        | 136 | <ul style="list-style-type: none"> <li>floor</li> </ul>                                                                     | 5 |
| 29 | 60-69 | F | 1       | Plastics        | Debridement and graft                                                                                              | Alpha       | 36.01 | -                                                        | 217 | <ul style="list-style-type: none"> <li>dermatome</li> <li>floor</li> </ul>                                                  | 6 |

|    |       |   |    |                  |                                                                       |            |       |   |     |                                          |   |
|----|-------|---|----|------------------|-----------------------------------------------------------------------|------------|-------|---|-----|------------------------------------------|---|
|    |       |   |    |                  | (arrived in OR intubated and left intubated)                          |            |       |   |     |                                          |   |
| 30 | 60-69 | M | 14 | Cardiac Surgery  | Aortic valve replacement (not extubated)                              | Not VOC    | 32.98 | - | 285 | •thoracic retractor<br>•floor            | 6 |
| 31 | 70-79 | M | 2  | Vascular Surgery | Carotid endarterectomy (intubation and extubation)                    | Not tested | -     | - | 178 | •ETT<br>•floor<br>•face shield (surgeon) | 4 |
| 32 | 40-49 | M | 0  | Neuro Surgery    | Decompressive Craniotomy (arrived in OR intubated and left intubated) | Not tested | -     | - | 77  | •floor                                   | 4 |

## Legend:

\*Age range used to preserve anonymity

## Abbreviations:

Yrs, years; VOC, variant of concern; NP, nasopharyngeal; Ct, cycle threshold: the number of cycles required for the fluorescent signal to cross the threshold in RT-PCR (a lower Ct would indicate a higher viral load); HCW, health care worker; M, male; F, female; OR, operating room; bilat, bilateral; ETT, endotracheal tube; n/a, not available; OB, Obstetrics; Ortho, Orthopedic Surgery; TAHBSO, total abdominal hysterectomy bilateral salpingo-oophorectomy; Alpha, Alpha variant (United Kingdom, B.1.1.7); ORIF, open reduction internal fixation; GI, gastrointestinal; Beta/Gamma, Beta or Gamma variant (South African, B.1.351 or Brazilian, P.1), UTM, universal transport medium

<sup>a</sup> The mean Ct value of the initial patient NP swab was 21.72, 95% CI 16.90-27.29 and 29.96 95% CI 27.07-33.43 respectively in the group of patients that had positive samples (evidence of SARS-CoV-2 RNA) and the group that had all samples negative (Mann-Whitney U test, p=0.007).

<sup>b</sup> The mean Ct value of the initial patient NP swab was 24.52 (95% CI: 18.72-30.99) and 28.41 (95% CI: 25.35-30.33) respectively in the group of patients that were known VOC and the group that included known non-VOC and unknown/untested status (Mann-Whitney U test, p=0.4561).

<sup>c</sup> Positive samples refer to the samples collected (patient, instrument, equipment, surface, air and mask) that have the presence of SARS-CoV-2 RNA detected on real time RT-PCR (reverse transcriptase polymerase chain reaction)

<sup>d</sup> Negative samples refer to the samples collected (patient, instrument, equipment, surface, air and mask) that do not have the presence of SARS-CoV-2 RNA detected on real time RT-PCR

<sup>e</sup> A variety of masks were used by HCWs in our cohort including American Society for Testing and Materials (ASTM) level 3 masks, N95 masks, double masks (inner mask sampled) or masks worn under face shields. Of 143 masks: 51 from nurses, 31 from anesthetists, 32 from surgeons and 29 from surgical house staff.

**Table II: Positive tests for SARS-CoV-2 RNA (number of positive samples/number of patients or cases sampled)**

| <b>Surgical Service (No. of cases)</b> | <b>Peritoneal fluid<sup>a</sup></b> | <b>Vaginal fluid<sup>a</sup></b> | <b>Myometrial swab<sup>a</sup></b> | <b>Placent a swab<sup>a</sup> (fetal side)</b> | <b>Surgical instruments<sup>a</sup></b> | <b>ETT<sup>a</sup></b> | <b>Cautery filter<sup>a</sup></b> | <b>Air sample from GilAir pump filter<sup>b</sup></b> | <b>Petri dish UTM (passive air sampling)<sup>a</sup></b> | <b>Floor swab<sup>b</sup></b> | <b>Face shield<sup>a</sup></b> | <b>Masks<sup>b</sup></b> |
|----------------------------------------|-------------------------------------|----------------------------------|------------------------------------|------------------------------------------------|-----------------------------------------|------------------------|-----------------------------------|-------------------------------------------------------|----------------------------------------------------------|-------------------------------|--------------------------------|--------------------------|
| Obstetrics<br>N=9                      | 1/5                                 | 1/7                              | 1/4                                | 1/7                                            | --                                      | 1/1                    | 0/4                               | 0/5                                                   | --                                                       | 0/14                          | 0/1                            | 0/34                     |
| Gynecology<br>Oncology<br>N=2          | --                                  | --                               | --                                 | --                                             | 1/1                                     | 1/2                    | 0/2                               | 0/3                                                   | --                                                       | 1/4                           | --                             | 0/11                     |
| Orthopedics/<br>Trauma<br>N=7          | --                                  | --                               | --                                 | --                                             | 0/5                                     | 1/1                    | 0/6                               | 0/11                                                  | 0/4                                                      | 1/14                          | --                             | 0/31                     |
| General<br>Surgery<br>N=2              | 0/1                                 | --                               | --                                 | --                                             | --                                      | 0/1                    | 0/2                               | 0/4                                                   | --                                                       | 0/4                           | 0/1                            | 0/9                      |
| Tracheo-<br>stomy<br>N=4               | --                                  | --                               | --                                 | --                                             | 0/1                                     | 3/4                    | 0/4                               | 0/8                                                   | 0/1                                                      | 2/8                           | --                             | 0/19                     |
| Gastro-<br>enterology<br>N=1           | --                                  | --                               | --                                 | --                                             | 1/1                                     | --                     | --                                | 0/2                                                   | 0/1                                                      | 0/2                           | --                             | 0/3                      |
| Burn/Plastic<br>Surgery<br>N=3         | --                                  | --                               | --                                 | --                                             | 0/2                                     | 2/2                    | 0/3                               | 0/8                                                   | 1/1                                                      | 1/8                           | 0/1                            | 0/22                     |
| Cardiac/<br>Vascular<br>Surgery<br>N=2 | --                                  | --                               | --                                 | --                                             | 0/1                                     | 0/1                    | 0/2                               | 0/4                                                   | --                                                       | 0/4                           | 0/1                            | 0/10                     |
| Neuro<br>Surgery<br>N=1                | --                                  | --                               | --                                 | --                                             | --                                      | --                     | 0/1                               | 0/2                                                   | --                                                       | 0/2                           | --                             | 0/4                      |
| <b>Total: 32 patients</b>              | <b>1/6</b>                          | <b>1/7</b>                       | <b>1/4</b>                         | <b>1/7</b>                                     | <b>2/11</b>                             | <b>8/12</b>            | <b>0/24</b>                       | <b>0/47</b>                                           | <b>1/7</b>                                               | <b>5/60</b>                   | <b>0/4</b>                     | <b>0/143</b>             |

1 Legend:

2 Abbreviations:

3  
4 -- (empty cell), sample was either: not taken, not applicable or patient consent was not possible; ETT, endotracheal tube; UTM, universal transport medium

5  
6 <sup>a</sup> number of positive tests/number of cases sampled

7  
8 <sup>b</sup> number of positive tests/number of tests performed (e.g. 1-2 tests per surgical/obstetrical case)

9  
10  
11  
12  
13  
14  
15  
16  
17  
18  
19  
20  
21  
22  
23  
24  
25  
26  
27  
28  
29  
30  
31  
32  
33  
34  
35  
36  
37  
38  
39  
40  
41  
42  
43  
44  
45  
46  
47

Confidential

1  
2  
3 APPENDIX A: eMETHODS (Supplement)  
4

5 For Sample Collection:  
6

7 GENERAL DETAILS:  
8

9 Each dental pledget was pre-moistened with up to 3cc of sterile UTM from a newly opened unused 15cc  
10 sterile Falcon tube containing 3 cc of UTM, universal transport medium (UTM®, Copan Diagnostics, CA,  
11 USA; <https://www.copanusa.com/sample-collection-transport-processing/utm-viral-transport/>).  
12

13 Hand hygiene and glove changes were performed between the collection of every sample and the  
14 outside surface of each container was wiped off with a CaviWipes™ towelette  
15 (<https://www.metrex.com/en-ca/caviwipes>) and then each sample was stored in a separate new  
16 biohazard marked ziploc plastic bag and placed in the fridge at 4° Celsius within 20 minutes. All collected  
17 samples were processed at the Shared Hospital laboratory, located at the Sunnybrook site (stored in the  
18 interim at -20° and then -80° Celsius).  
19  
20

21 Sinai Health samples were stored in the fridge locally and transferred to Sunnybrook within 24 hours.  
22

23 Samples were analyzed by RT-PCR as previously described (Vermeiren C, Marchand-Senecal X, Sheldrake  
24 E, et al. Comparison of Copan Eswab and FLOQswab for COVID-19 PCR diagnosis: working around a  
25 supply shortage. J Clin Microbiol 2020.)  
26

27 All the operating rooms (including those in the Birthing area) have 20 air exchanges an hour.  
28

29 Cycle threshold values (the number of cycles required for the fluorescent signal to cross the threshold in  
30 RT-PCR) quantified viral load, with lower values indicative of a higher viral load.  
31

32 PATIENT SAMPLES  
33

34 1) PERITONEAL SAMPLE:  
35

36 Taken by a member of the obstetrical/surgical team: 5-10 cc of peritoneal fluid (if present upon entering  
37 the cavity), or, if no fluid seen, 10cc of sterile saline was placed in the peritoneal cavity with a 10cc  
38 sterile syringe and then whatever volume of fluid aspirated back into the syringe was placed in an 80cc  
39 sterile plastic container.  
40

41 2) VAGINA:  
42

43 Taken by a member of the obstetrical team: a vaginal speculum was placed in the vagina before delivery  
44 (typically after informed consent and well before active labor, or, before cesarean delivery) and up to 5  
45 cc of pooled vaginal fluid was aspirated with a sterile 10cc syringe. If no vaginal fluid was seen, 10cc of  
46 sterile saline was placed in the vagina with a 10cc sterile syringe and then whatever volume of fluid that  
47 was aspirated back into the syringe was placed in an 80cc sterile plastic container.  
48  
49

50 3) MYOMETRIUM:  
51

52 Taken by a member of the obstetrical team at the time of cesarean delivery, after the baby is delivered  
53 and hemostasis managed, a flocked swab (iClean, HCY, Shenzhen, China;  
54 <https://www.chenyanglobal.com/oropharyngeal-nylon-flocked-swab-product/>) was used to wipe the  
55  
56  
57  
58  
59  
60

1  
2  
3 incised surface of the myometrium and the swab placed immediately in a 15cc sterile plastic Falcon tube  
4 containing 3cc of UTM.  
5

6 4) PLACENTA:

7  
8 Taken by a member of the obstetrical/research team at the end of the case with a flocked swab which  
9 was used to wipe the surface of the membranous placenta and the swab was placed immediately in a  
10 15cc sterile plastic Falcon tube containing 3cc of UTM.  
11  
12  
13

14 ENVIROMENTAL SAMPLES

15  
16 5) FLOOR:

17  
18 Taken by a member of the research team at the end of the case: a sterile dental pledget (3/8" x 1.5"  
19 cylindrical sponge, SDP Inc. Montreal, Canada; <https://www.sdpmedical.com/en/cylindrical-sponges>)  
20 was pre-moistened with universal transport media and the floor was swabbed in a location as close to  
21 the patient as permits and also 2 metres away. The swabbing was performed in a standardized fashion  
22 over a 10x10cm area with 2 perpendicular "S" swipes (or over a 30x30cm area for the last 12 of 32  
23 cases). The pledget was placed immediately in a 15cc sterile plastic Falcon tube containing 3cc of UTM.  
24  
25

26 6) ENDOTRACHEAL TUBE (ETT):

27  
28 Taken by a member of the research team at the end of the case after the patient was extubated: a  
29 sterile dental pledget or a flocked swab was pre-moistened with UTM and used to wipe the length of the  
30 distal half of the ETT and the pledget/swab placed immediately in a 15cc sterile plastic Falcon tube  
31 containing 3cc of UTM.  
32

33 7) SURGICAL INSTRUMENTS / EQUIPMENT:

34  
35 Taken by a member of the research team at the end of the case: a sterile dental pledget was pre-  
36 moistened with UTM and used to wipe the part of the instrument or equipment that was in direct  
37 contact with the patient's surgical site. The pledget then placed immediately in a 15cc sterile plastic  
38 Falcon tube containing 3cc of UTM.  
39  
40

41 8) PASSIVE AIR SAMPLE:

42  
43 3cc of sterile UTM was placed in a sterile 90mm Petri dish which was placed open by a member of the  
44 research team at the beginning of the case within 1-2 metres of the patient and in a location that would  
45 not interfere with patient care, on a Mayo stand about 1 metre high from the floor. The Petri dish was  
46 retrieved at the end of the case and the UTM in it transferred to a sterile Falcon tube.  
47

48 9) ACTIVE AIR SAMPLE:

49  
50 A member of the research team set up 2 air samplers at the start of the case: one in a location that was  
51 as close as possible to the surgical site (within 1 metre) and without interfering with patient care; and a  
52 second one in a location that was 2-3 metres away from the surgical site (and 1-1.5 metres from the  
53 floor). Samples were collected with a 37 mm three-piece cassette with 0.8 µm polycarbonate filter,  
54 sampling at a rate of 3.5L/min for the duration of the procedure with PCR detection after elution from  
55 the filter. The GilAir pump was turned on when the patient was brought into the OR and the pump was  
56  
57  
58  
59  
60

1  
2  
3 stopped when the patient left the room. The filter cassette containing sampled air was wiped on its  
4 outer casing with a CaviWipes™ towelette and placed in a new biohazard marked ziploc bag.  
5

6 For obstetrical patients with non-operative delivery, one air sampler was placed within 1 metre of the  
7 patient's head and at the level of her mouth; the second sampler was placed approximately 2 metres  
8 away from the perineum.  
9

#### 10 10) CAUTERY FILTER:

11  
12 If cautery was used, at the end of the case, a member of the research team removed the cautery filter  
13 device (marVac grey box, <https://www.klsmartin.com/en/products/electrosurgery/smoke-evacuation/>)  
14 and its surface was wiped with a CaviWipes™ towelette and the filter housed in its original box was  
15 placed in a new biohazard marked ziploc bag and then placed in the freezer.  
16  
17

#### 18 11) MASK SAMPLE:

19  
20 Masks were swabbed on their inside surface by a member of the research team with a sterile dental  
21 pledget that was pre-moistened with UTM – wiping over the inside of the mask twice in the area (up to  
22 10x10cm) that would have been in contact with the nose and mouth. The pledget then placed  
23 immediately in a 15cc sterile Falcon tube containing 3cc of UTM.  
24

#### 25 12) FACE SHIELD:

26  
27 The outer facing surface of the face shield (at least a surface area of 10 x 15 cm) was wiped with a sterile  
28 flocked swab that was pre-moistened with sterile UTM and the swab then placed immediately in a 15cc  
29 sterile Falcon tube containing 3cc of UTM.  
30  
31  
32  
33  
34  
35  
36  
37  
38  
39  
40  
41  
42  
43  
44  
45  
46  
47  
48  
49  
50  
51  
52  
53  
54  
55  
56  
57  
58  
59  
60
